# Supplementary material for: Outlining the Phytoconstituents of Greek Clover Herb Extract and Assessment of Its Effect against Foodborne Infections Caused by Salmonella typhimurium
Source: MDPI journal article supplement (doi:10.3390/ph17020259), 2024-02-18
Supplement: s1 [file s1]

# Phytochemical profiling of Greek clover herb extract and its potential antibacterial effect using *in vitro* and *in vivo* investigations

Jawaher Alqahtani <sup>1†\*</sup>, Walaa A. Negm <sup>2†</sup>, Engy Elekhrawy <sup>3</sup>, Ismail A. Hussein <sup>4</sup>, Ehssan Moglad <sup>5</sup>, Sarah Ibrahim <sup>6</sup>, Suzy A. El-Sherbeni <sup>2\*</sup>

Figure S1. Negative mode total ion chromatogram of LC-ESI-MS/MS of *Trigonella foenum-graecum* herb extract.

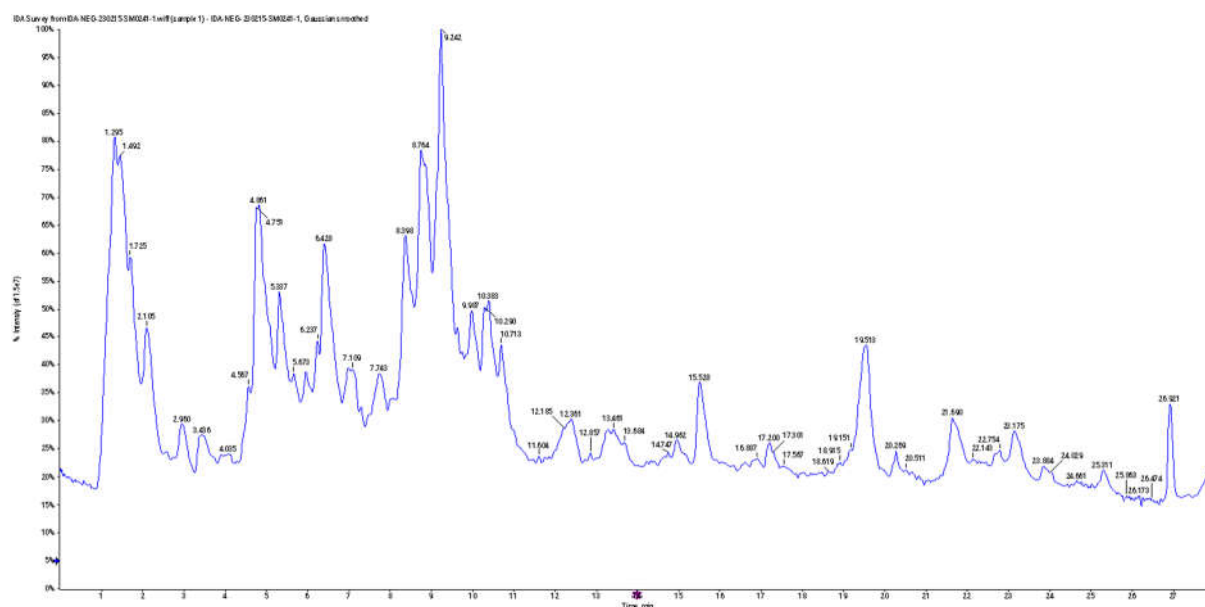

Table S1. Sequences of the primers

| Gene    | Forward primer        | Reverse primer        |
|---------|-----------------------|-----------------------|
| iNOS    | GCTATGGCCGCTTTGATGTG  | ACCTCCAGTAGCATGTTGGC  |
| GPX-1   | AATGTCGCGTCTCTCTGAGG  | TTGCCATTCTGGTGTCCGAA  |
| B actin | GATCAGCAAGCAGGAGTACGA | AAAACGCAGCTCAGTAACAGT |
